# Supplementary material for: The effects of fermentation products of prebiotic fibres on gut barrier and immune functions in vitro
Source: PeerJ. 2018 Aug 10;6:e5288. doi: 10.7717/peerj.5288 (PMC6089210; doi:10.7717/peerj.5288)
Supplement: Supplemental Information 1 [file peerj-06-5288-s001.xlsx]

## Sheet: Oat bglucan 28%_HG
Healthy gut
both plates	1	1	2	2	3	3	4	4	5	5	6	6
A	104.19	107.794	108.373	115.112	110.93	113.636	115.067	116.947	117.808	113.41	115.041	112.128
B	112.802	117.139	113.452	113.25	117.275	105.935	120.757	125.386	119.632	126.244	123.885	120.631
C	117.561	113.302	112.5	119.471	118.689	115.376	120.255	121.436	118.153	125.754	122.474	124.888
D	108.084	111.058	109.547	127.306	116.216	119.207	119.42	131.13	122.593	128.125	119.235	123.341
	average
Control	112.536
0-1-A	113.324
0-2-A	115.921
0-3-A	115.45
24-1-A	123.064
24-2-A	123.417
24-3-A	122.409
	average	SEM
Control	112.536	1.17023
0 h fermentation	114.898	1.16483
24 h fermentation	122.963	0.815497
ttest
0.000693082

## Sheet: XOS_HG
Healthy gut
both plates	1	1	2	2	3	3	4	4	5	5	6	6
A	101.033	114.545	109.008	120.466	109.633	116.25	113.422	129.089	115.062	119.255	114.393	117.945
B	108.731	117.839	112.174	118.062	113.014	121.23	117.271	120.482	120.667	121.778	124.201	128.214
C	111.229	119.701	113.033	118.485	113.095	118.786	118.115	121.11	119.792	124.182	122.176	126.516
D	104.901	115.556	111.798	118.75	111.677	119.394	124.331	126.866	121.98	132.01	120.386	122.494
	average
Control	115.009
0-1-A	112.993
0-2-A	115.384
0-3-A	116.2
24-1-A	121.362
24-2-A	123.401
24-3-A	123.998
	average	SEM
Control	115.009	1.98396
0 h fermentation	114.859	1.04533
24 h fermentation	122.921	0.87223
ttest
0.00297493

## Sheet: inulin-HG
Healthy gut
both plates	1	1	2	2	3	3	4	4	5	5	6	6
A	103.723	110.941	108.391	114.123	109.457	115.566	109.565	114.286	111.836	111.866	109.609	113.672
B	107.359	110.538	105.913	114.856	110.934	109.865	114.345	126.129	116.418	125.552	116	120.133
C	103.895	110.337	108.718	113.122	109.705	110.302	114.403	122.43	118.571	123.184	116.989	121.389
D	104.829	112.955	104.499	114.35	119.643	114.472	114.979	120.759	118.111	123.418	115.088	120.137
	average
Control	111.086
0-1-A	108.319
0-2-A	110.243
0-3-A	112.487
24-1-A	118.841
24-2-A	120.876
24-3-A	118.289
	average	SEM
Control	111.086	0.937581
0 h fermentation	110.35	0.978246
24 h fermentation	119.335	0.898141
ttest
0.00334749

## Sheet: Oat bglucan 94%-HG
Healthy gut
both plates	1	1	2	2	3	3	4	4	5	5	6	6
A	103.797	111.796	107.436	112.824	108.442	111.967	109.524	110.594	111.86	109.759	107.722	106.389
B	110.456	112.824	109.95	111.084	109.413	112.763	110.439	119.11	114.77	121.649	116.687	116.796
C	108.987	112.67	111.41	114.213	109.34	110.67	116.052	120.602	118.118	120.368	116.273	119.259
D	109.41	110	110.114	108.486	110.949	110.375	113.043	103.664	117.174	119.024	116.039	114.815
	average
Control	109.342
0-1-A	110.724
0-2-A	110.876
0-3-A	110.585
24-1-A	113.819
24-2-A	118.517
24-3-A	116.645
	average	SEM
Control	109.342	0.776972
0 h fermentation	110.728	0.36269
24 h fermentation	116.327	0.992622
ttest
0.0149565

## Sheet: Chicory root_HG
Healthy gut
both plates	1	1	2	2	3	3	4	4	5	5	6	6
A	104.49	108.776	97.0495	105.495	103.093	107.475	103.183	106.355	100.787	106.243	99.2265	103.759
B	103.492	107.335	105.724	108.603	108.161	103.961	124.372	124.539	122.61	128.059	116.34	119.865
C	105.778	107.629	103.618	107.83	107.521	106.019	115.49	115.579	116.861	119.181	112.055	117.723
D	103.233	102.5	102.027	105.15	104.978	105.677	113.77	116.781	116.506	122.877	109.345	114.12
	average	stdev
Control	103.828
0-1-A	104.995
0-2-A	105.492
0-3-A	106.053
24-1-A	118.422
24-2-A	121.016
24-3-A	114.908
	average	SEM
Control	103.828	0.994447
0 h fermentation	105.513	0.481974
24 h fermentation	118.115	1.13964
ttest
0.00217276

## Sheet: Maltodextrin_HG
Healthy gut
both plates	1	1	2	2	3	3	4	4	5	5	6	6
A	101.858	100.957	106.616	104.632	104.81	103.815	103.233	103.634	107.666	105.19	105.804	103.947
B	106.199	105.589	107.949	108.13	105.889	109.364	117.58	121.618	120.203	123.529	115.165	114.977
C	105.476	105.804	106.369	106.061	107.969	107.746	118.447	120.472	123.22	118.679	114.823	117.978
D	103.919	107.47	104.788	106.44	101.972	106.832	118.233	120.205	115.504	122.541	111.706	117.156
	average
Control	104.347
0-1-A	105.743
0-2-A	106.623
0-3-A	106.628
24-1-A	119.426
24-2-A	120.613
24-3-A	115.301
	average	SEM
Control	104.347	0.544763
0 h fermentation	106.331	0.405604
24 h fermentation	118.446	0.763779
ttest
0.00177574

## Sheet: Oat bglucan 28%-TEER-EtOH
TEER assay 17.3.17				pretreated plate 1			Stressor: EtOH 5%
Before stressor									with blank substraction		157
HTS 1	1	2	3	4	5	6			1	2	3	4	5	6
A	1136	1143	1195	1175	1127	1209		A	979	986	1038	1018	970	1052
B	1134	1175	1159	1245	1189	1401		B	977	1018	1002	1088	1032	1244
C	1170	1141	1270	1143	1270	1277		C	1013	984	1113	986	1113	1120
D	1195	1084	1078	1251	1212	1216		D	1038	927	921	1094	1055	1059
After stressor									with blank substraction		157
HTS 1	1	2	3	4	5	6			1	2	3	4	5	6
A	780	817	777	470	449	434		A	623	660	620	313	292	277
B	435	525	522	542	526	579		B	278	368	365	385	369	422
C	432	494	523	501	533	495		C	275	337	366	344	376	338
D	464	446	454	512	515	519		D	307	289	297	355	358	362
	Before stressor	After stressor	% TEER of basal						% TEER of basal
	average	average	average						1	2	3	4	5	6
Control	1001	634.333	63.37					A	63.6364	66.9371	59.7303	30.7466	30.1031	26.3308
EtOH 5%	1013.33	294	29.0132					B	28.4545	36.1493	36.4271	35.386	35.7558	33.9228
0-1-A	1009.33	286.667	28.4016					C	27.1471	34.248	32.8841	34.8884	33.7826	30.1786
0-2-A	976.333	331.333	33.9365					D	29.5761	31.1758	32.2476	32.4497	33.9336	34.1832
0-3-A	1012	342.667	33.8603
24-1-A	1056	361.333	34.2172							% TEER of basal
24-2-A	1066.67	367.667	34.4688							average	SEM
24-3-A	1141	374	32.7783						Control	63.37	2.08289
									Basolateral stressor	29.0132	1.37726
									0 h fermentation	32.0661	1.83241
									24 h fermentation	33.8214	0.526597
										t-test
									EtOH vs 0 h	0.259947
									EtOH vs 24 h	0.0320042
									0h vs 24 h	0.409341

## Sheet: XOS-TEER-EtOH
TEER assay 21.4.17				pretreated plate 1			Stressor: EtOH 5%
Before stressor									with blank substraction		157
HTS 1	1	2	3	4	5	6			1	2	3	4	5	6
A	1113	1160	1158	1135	1116	1135		A	956	1003	1001	978	959	978
B	1141	1219	1204	1310	1276	1302		B	984	1062	1047	1153	1119	1145
C	1136	1181	1138	1309	1358	1412		C	979	1024	981	1152	1201	1255
D	1104	1198	1243	1212	1325	1333		D	947	1041	1086	1055	1168	1176
After stressor									with blank substraction		157
HTS 1	1	2	3	4	5	6			1	2	3	4	5	6
A	832	799	780	490	475	476		A	675	642	623	333	318	319
B	461	510	528	535	537	533		B	304	353	371	378	380	376
C	485	512	517	544	562	559		C	328	355	360	387	405	402
D	454	504	515	503	563	567		D	297	347	358	346	406	410
	Before stressor	After stressor	% TEER of basal						% TEER of basal
	average	average	average						1	2	3	4	5	6
Control	986.667	646.667	65.5405					A	70.6067	64.008	62.2378	34.0491	33.1595	32.6176
EtOH 5%	971.667	323.333	33.2762					B	30.8943	33.2392	35.4346	32.784	33.9589	32.8384
0-1-A	970	309.667	31.9244					C	33.5036	34.668	36.6972	33.5938	33.7219	32.0319
0-2-A	1042.33	351.667	33.7384					D	31.3622	33.3333	32.965	32.7962	34.7603	34.8639
0-3-A	1038	363	34.9711
24-1-A	1120	370.333	33.0655							% TEER of basal
24-2-A	1162.67	397	34.1456							average	SEM
24-3-A	1192	396	33.2215						Control	65.5405	2.54641
									Basolateral stressor	33.2762	0.417277
									0 h fermentation	33.5446	0.884827
									24 h fermentation	33.4775	0.337077
										t-test
									EtOH vs 0 h	0.796787
									EtOH vs 24 h	0.725449
									0h vs 24 h	0.946904

## Sheet: inulin-TEER-EtOH
TEER assay 12.5.17				pretreated plate 1			Stressor: EtOH 5%
Before stressor									with blank substraction		157
HTS 1	1	2	3	4	5	6			1	2	3	4	5	6
A	1261	1187	1261	1257	1243	1247		A	1104	1030	1104	1100	1086	1090
B	1284	1236	1236	1300	1337	1298		B	1127	1079	1079	1143	1180	1141
C	1256	1259	1271	1292	1284	1275		C	1099	1102	1114	1135	1127	1118
D	1319	1279	1327	1362	1270	1322		D	1162	1122	1170	1205	1113	1165
After stressor									with blank substraction		157
HTS 1	1	2	3	4	5	6			1	2	3	4	5	6
A	940	856	923	504	472	482		A	783	699	766	347	315	325
B	495	498	511	510	519	509		B	338	341	354	353	362	352
C	485	515	511	503	490	492		C	328	358	354	346	333	335
D	496	528	520	528	512	520		D	339	371	363	371	355	363
	Before stressor	After stressor	% TEER of basal						% TEER of basal
	average	average	average						1	2	3	4	5	6
Control	1079.33	749.333	69.4256					A	70.9239	67.8641	69.3841	31.5455	29.0055	29.8165
EtOH 5%	1092	329	30.1282					B	29.9911	31.6033	32.8082	30.8836	30.678	30.8501
0-1-A	1129.33	335	29.6635					C	29.8453	32.4864	31.7774	30.4846	29.5475	29.9642
0-2-A	1101	356.667	32.3948					D	29.1738	33.066	31.0256	30.7884	31.8958	31.1588
0-3-A	1121	357	31.8466
24-1-A	1161	356.667	30.7206							% TEER of basal
24-2-A	1140	350	30.7018							average	SEM
24-3-A	1141.33	350	30.6659						Control	69.4256	0.883305
									Basolateral stressor	30.1282	0.749006
									0 h fermentation	31.3016	0.834203
									24 h fermentation	30.6961	0.0160578
										t-test
									EtOH vs 0 h	0.352257
									EtOH vs 24 h	0.486574
									0h vs 24 h	0.508182

## Sheet: Oat bglucan 94%-TEER-EtOH
TEER assay 7.4.17				pretreated plate 1			Stressor: EtOH 5%
Before stressor									with blank substraction		157
HTS 1	1	2	3	4	5	6			1	2	3	4	5	6
A	1045	1040	1033	1050	1036	1030		A	888	883	876	893	879	873
B	1020	1062	1074	1122	1137	1183		B	863	905	917	965	980	1026
C	1052	1050	1059	1152	1192	1147		C	895	893	902	995	1035	990
D	1062	1047	1103	1075	1157	1162		D	905	890	946	918	1000	1005
After stressor									with blank substraction		157
HTS 1	1	2	3	4	5	6			1	2	3	4	5	6
A	781	737	694	446	456	466		A	624	580	537	289	299	309
B	448	484	484	524	503	527		B	291	327	327	367	346	370
C	461	485	495	495	516	545		C	304	328	338	338	359	388
D	456	455	488	496	537	545		D	299	298	331	339	380	388
	Before stressor	After stressor	% TEER of basal						% TEER of basal
	average	average	average						1	2	3	4	5	6
Control	882.333	580.333	65.7726					A	70.2703	65.6852	61.3014	32.3628	34.0159	35.3952
EtOH 5%	881.667	299	33.913					B	33.7196	36.1326	35.6598	38.0311	35.3061	36.0624
0-1-A	887.667	298	33.5712					C	33.9665	36.7301	37.4723	33.9698	34.686	39.1919
0-2-A	896	317.667	35.4539					D	33.0387	33.4831	34.9894	36.9281	38	38.607
0-3-A	921.667	332	36.0217
24-1-A	959.333	348	36.2752							% TEER of basal
24-2-A	1005	361.667	35.9867							average	SEM
24-3-A	1007	382	37.9345						Control	65.7726	2.58932
									Basolateral stressor	33.913	0.876558
									0 h fermentation	35.0156	0.740577
									24 h fermentation	36.7321	0.606905
										t-test
									EtOH vs 0 h	0.395599
									EtOH vs 24 h	0.057987
									0h vs 24 h	0.147476

[truncated: 20 more sheets: Chicory root-TEER-EtOH, Maltodextrin-TEER-EtOH, Oat bglucan 28%-LY-EtOH, XOS-LY-EtOH, inulin-LY-EtOH, Oat bglucan 94%-LY-EtOH, Chicory root-LY-EtOH, Maltodextrin-LY-EtOH, Oat bglucan 28-TEER-Rhamnolipid, XOS-TEER-Rhamnolip, Inulin-TEER-Rhamnolip, Oat bglucan 94%-TEER-Rhamnolip, WholeFibre-TEER-Rhamnolipid, Maltodextrin-TEER-Rhamnoli, Oatwell-LY-Rhamnolipid, XOS-LY-Rhamnolipid, inulin-LY-Rhamnolipid, Oat bglucan 94%-LY-Rhamnolipid, Chicory root-LY-Rhamnolipid, Maltodextrin-LY-Rhamnolipid]
