# Supplementary material for: The effects of fermentation products of prebiotic fibres on gut barrier and immune functions in vitro
Source: PeerJ. 2018 Aug 10;6:e5288. doi: 10.7717/peerj.5288 (PMC6089210; doi:10.7717/peerj.5288)
Supplement: Supplemental Information 2 [file peerj-06-5288-s002.xlsx]

## Sheet: Donor 1
Alcian Blue Absorbance read Spectramax 600 nM
	2	3	4	5	6	7	8	9	10
B	0.136174	0.140936	0.142282	0.154717	0.150914	0.152422	0.145516	0.149843	0.14426
C	0.142548	0.142445	0.146164	0.150377	0.152127	0.160545	0.15128	0.153278	0.151106
D	0.139169	0.153802	0.149721	0.152728	0.160588	0.15533	0.155707	0.154701	0.156385
E	0.142349	0.152751	0.15199	0.164147	0.162176	0.154791	0.171224	0.165627	0.172045
F	0.147705	0.145282	0.157544	0.145387	0.147388	0.14562	0.152822	0.152685	0.148278
G	0.147937	0.153294	0.152917	0.156148	0.158782	0.174076	0.151669	0.143852	0.146435
	average	STD											ttest compared 24h to 0h
Oat β-glucan 28% - 0h	0.147564	0.00755097											Oat β-glucan 28% - 0h
Oat β-glucan 28% - 24h	0.14903	0.00579819											Oat β-glucan 28% - 24h	0.80289
Chicory root (75% inulin) - 0h	0.150177	0.00649413											Chicory root (75% inulin) - 0h
Chicory root (75% inulin)n - 24h	0.151382	0.00298977											Chicory root (75% inulin)n - 24h	0.784815
XOS 70%- 0h	0.152685	0.00191516											XOS 70%- 0h
XOS 70%- 24h	0.15435	0.0054361											XOS 70%- 24h	0.643019
Inulin 90% - 0h	0.156215	0.00400409											Inulin 90% - 0h
Inulin 90% - 24h	0.160371	0.00493208											Inulin 90% - 24h	0.320434
Oat β-glucan 94% - 0h	0.146132	0.0010943											Oat β-glucan 94% - 0h
Oat β-glucan 94% - 24h	0.163002	0.00968035											Oat β-glucan 94% - 24h	0.0399625
Maltodextrin - 0h	0.14654	0.00292848											Maltodextrin - 0h
Maltodextrin - 24h	0.151888	0.00120715											Maltodextrin - 24h	0.0430424
CONTROL	0.14929	0.00369895

## Sheet: Donor 2
Alcian Blue Absorbance read Spectramax 600 nM
	2	3	4	5	6	7	8	9	10
B	0.135726	0.132599	0.136054	0.138859	0.13196	0.129484	0.136151	0.145866	0.138296
C	0.160138	0.152777	0.1624	0.143662	0.141843	0.144072	0.147313	0.133419	0.146612
D	0.144788	0.14711	0.153205	0.147639	0.160932	0.177365	0.173511	0.150814	0.146602
E	0.142935	0.145373	0.143807	0.152168	0.155701	0.173773	0.17747	0.177509	0.160128
F	0.125644	0.13705	0.149348	0.143619	0.145968	0.173288	0.163955	0.157288	0.144741
G	0.129918	0.135657	0.124868	0.140775	0.139189	0.136628	0.135404	0.128857	0.126223
	average	STD											ttest compared 24h to 0h
Oat β-glucan 28% - 0h	0.148368	0.00434732
Oat β-glucan 28% - 24h	0.144038	0.00123568											Oat β-glucan 28% - 0h	0.172427
Chicory root (75% inulin) - 0h	0.137348	0.0118546											Oat β-glucan 28% - 24h
Chicory root (75% inulin)n - 24h	0.130148	0.00539838											Chicory root (75% inulin) - 0h	0.392589
XOS 70%- 0h	0.133434	0.00485805											Chicory root (75% inulin)n - 24h
XOS 70%- 24h	0.143192	0.00118646											XOS 70%- 0h	0.0277944
Inulin 90% - 0h	0.161979	0.0148905											XOS 70%- 24h
Inulin 90% - 24h	0.160547	0.011589											Inulin 90% - 0h	0.901772
Oat β-glucan 94% - 0h	0.154292	0.0164927											Inulin 90% - 24h
Oat β-glucan 94% - 24h	0.138864	0.00209273											Oat β-glucan 94% - 0h	0.183263
Maltodextrin - 0h	0.140105	0.00510403											Oat β-glucan 94% - 24h
Maltodextrin - 24h	0.142448	0.00782764											Maltodextrin - 0h	0.686421
CONTROL	0.142745	0.0153953											Maltodextrin - 24h

## Sheet: Donor 3
Alcian Blue Absorbance read Spectramax 600 nM
	2	3	4	5	6	7	8	9	10
B	0.11254	0.120196	0.119884	0.121063	0.120352	0.117979	0.118852	0.124559	0.117525
C	0.139476	0.139554	0.141147	0.136303	0.13885	0.14131	0.141428	0.134363	0.132336
D	0.126475	0.136409	0.149811	0.13313	0.144431	0.136742	0.136262	0.128943	0.135063
E	0.128556	0.135532	0.139691	0.14357	0.139106	0.140022	0.128019	0.154495	0.132651
F	0.121513	0.129869	0.130672	0.133391	0.145311	0.137568	0.129642	0.125283	0.133019
G	0.124663	0.125022	0.114747	0.125426	0.131969	0.123658	0.137929	0.116114	0.119448
	average	STD											ttest compared 24h to 0h
Oat β-glucan 28% - 0h	0.137565	0.0117106											Oat β-glucan 28% - 0h
Oat β-glucan 28% - 24h	0.134593	0.00562681											Oat β-glucan 28% - 24h	0.712202
Chicory root (75% inulin) - 0h	0.127351	0.00507238											Chicory root (75% inulin) - 0h
Chicory root (75% inulin)n - 24h	0.121477	0.0058313											Chicory root (75% inulin)n - 24h	0.258411
XOS 70%- 0h	0.119798	0.00161492											XOS 70%- 0h
XOS 70%- 24h	0.138821	0.00250365											XOS 70%- 24h	0.000380124
Inulin 90% - 0h	0.138101	0.00577212											Inulin 90% - 0h
Inulin 90% - 24h	0.140899	0.00235767											Inulin 90% - 24h	0.4804
Oat β-glucan 94% - 0h	0.138757	0.0060482											Oat β-glucan 94% - 0h
Oat β-glucan 94% - 24h	0.127018	0.0043778											Oat β-glucan 94% - 24h	0.052811
Maltodextrin - 0h	0.120312	0.00373692											Maltodextrin - 0h
Maltodextrin - 24h	0.136042	0.00477258											Maltodextrin - 24h	0.0108652
CONTROL	0.126906	0.00825918
